1 **Design of the recombinant influenza neuraminidase antigen is**  
2 **crucial for protective efficacy**

3

4 Jin Gao<sup>a</sup>, Laura Klenow<sup>a</sup>, Lisa Parsons<sup>b</sup>, Tahir Malik<sup>a</sup>, Je-Nie Phue<sup>c</sup>, Zhizeng Gao<sup>d</sup>, Stephen G.  
5 Withers<sup>d</sup>, John Cipollo<sup>b</sup>, Robert Daniels<sup>a</sup>, Hongquan Wan<sup>a</sup>

6

7 <sup>a</sup>Division of Viral Products, Center for Biologics Evaluation and Research, Food and Drug  
8 Administration, Silver Spring, MD; <sup>b</sup>Division of Bacterial, Parasitic and Allergenic Products, Center  
9 for Biologics Evaluation and Research, Food and Drug Administration, Silver Spring, MD; <sup>c</sup>Facility  
10 for Biotechnology Resources, Center for Biologics Evaluation and Research, Food and Drug  
11 Administration, Silver Spring, MD; <sup>d</sup>Department of Chemistry, University of British Columbia,  
12 Vancouver, Canada.

13

14 Running title: Optimizing the recombinant neuraminidase design

15

16 Correspondence to:

17 Robert Daniels: [Robert.daniels@fda.hhs.gov](mailto:Robert.daniels@fda.hhs.gov); Hongquan Wan: [Hongquan.wan@fda.hhs.gov](mailto:Hongquan.wan@fda.hhs.gov).

18

19 Abstract word count: 220

20 Importance word count: 123

21 Text word count: 5346

## 22 **ABSTRACT**

23           Supplementing influenza vaccines with recombinant neuraminidase (rNA) remains a  
24 promising approach for improving the suboptimal efficacy. However, correlations among rNA  
25 designs, properties, and protection have not been systematically investigated. Here, we performed a  
26 comparative analysis of several rNAs produced from different construct designs using the  
27 baculovirus/insect cell system. The rNAs were designed with different tetramerization motifs and NA  
28 domains from a recent H1N1 vaccine strain (A/Brisbane/02/2018) and were analyzed for enzymatic  
29 properties, antigenicity, thermal and size stability, and protection in mice. We found that rNAs  
30 containing the NA head-domain versus the full-ectodomain possess distinct enzymatic properties and  
31 that the molecular size stability is tetramerization domain-dependent, whereas protection is more  
32 contingent on the combination of the tetramerization and NA domains. Following single-dose  
33 immunizations, a rNA possessing the full-ectodomain, non-native enzymatic activity, and the  
34 tetramerization motif from the human vasodilator-stimulated phosphoprotein provided substantially  
35 higher protection than a rNA possessing the head-domain, native activity and the same tetramerization  
36 motif. In contrast, these two rNAs provided comparable protection when the tetramerization motif  
37 was exchanged with the one from the tetrabrachion protein. These findings demonstrate that the rNA  
38 design is crucial for the protective efficacy and should be thoroughly evaluated for vaccine  
39 development, as the unpredictable nature of the heterologous domain combination can result in rNAs  
40 with similar key attributes but vastly differ in protection.

41 **IMPORTANCE**

42 For several decades it has been proposed that influenza vaccines could be supplemented with  
43 recombinant neuraminidase (rNA) to improve the efficacy. However, some key questions for  
44 manufacturing stable and immunogenic rNA remain to be answered. We show here that the  
45 tetramerization motifs and NA domains included in the rNA construct design can have a profound  
46 impact on the biochemical, immunological and protective properties. We also show that the single-  
47 dose immunization regimen is more informative for assessing the rNA immune response and  
48 protective efficacy, which is surprisingly more dependent on the specific combination of NA and  
49 tetramerization domains than common attributes for evaluating NA. Our findings may help to  
50 optimize the design of rNAs that can be used to improve or develop influenza vaccines.

51

52 **KEY WORDS** Influenza vaccine improvement, recombinant neuraminidase, immune response,  
53 protective efficacy, recombinant antigen optimization

## 54 INTRODUCTION

55 Influenza vaccine efficacy remains suboptimal despite the concerted efforts to monitor the  
56 evolution of influenza viruses and frequent updates on the vaccine composition (1-3). A contributing  
57 factor to the poor efficacy is the need to prepare candidate vaccine viruses containing a hemagglutinin  
58 (HA) that antigenically matches the circulating strains months ahead of each influenza season. This  
59 requirement combined with the propensity of HA to mutate under selective pressure from antibodies  
60 makes it difficult to significantly improve the vaccine efficacy using HA alone. Accordingly, many  
61 studies have begun to investigate the potential benefits of including other influenza antigens such as  
62 neuraminidase (NA), the second most abundant surface glycoprotein on influenza virus (4, 5).

63 NA is a sialidase that promotes the spread of influenza virus by removing the receptors for  
64 HA (5, 6). Previous work has shown that NA-specific antibodies/immunity can inhibit the growth of  
65 influenza viruses *in vitro* and confer protection against influenza virus infection in animal models and  
66 humans (7-12). The confirmed benefits of NA immunity and additional advantages such as its  
67 relatively slower evolution than HA (13, 14), make NA an attractive target for optimizing influenza  
68 vaccines.

69 Current inactivated influenza vaccines often contain the NA from the recommended vaccine  
70 strains. However, the amount is usually low and variable (15, 16), likely due to its labile nature and  
71 strain-dependent differences in NA content (17). Options for addressing this bottleneck include  
72 developing candidate vaccine viruses that contain higher NA content or supplementing influenza  
73 vaccines with purified viral NA or recombinant NA (rNA). While NA isolated from viruses and  
74 produced recombinantly have both shown promising protective efficacy (18-24), rNA expressed in  
75 the baculovirus/insect cell system currently has a greater potential for practical use because of its

76 capacity to generate high yields and the system is currently used for manufacturing licensed vaccines,  
77 including the HA-based influenza vaccine, Flublok (25).

78         Prior studies examining rNA protection have tested various construct designs and have all  
79 used a two-dose immunization (prime and boost) with rNA protein amounts as high as >20 µg per  
80 mouse (26-30). While these studies have demonstrated the protective benefit of rNA, several key  
81 questions remain for implementing rNA antigens in influenza vaccines, *e.g.*, How does the rNA  
82 construct design affect the quality attributes and protective efficacy? Is NA enzymatic activity a  
83 reliable indicator of rNA immunogenicity/protection? Can protection be achieved with a single dose  
84 of rNA using cost-effective amounts? In the current study we have addressed these questions using  
85 rNAs that contain different stabilizing tetramerization domains combined with either the NA head-  
86 domain or full-ectodomain. Our results show that the rNA construct design is critical for protection  
87 by single-dose immunization with low rNA amounts and that rNA antigens being developed for  
88 influenza vaccines should be thoroughly characterized, as the protective efficacy can differ between  
89 rNAs with similar quality attributes.

90

## 91 **RESULTS**

92 **Design and purification of rNAs expressed in insect cells.** Influenza NA is a membrane  
93 glycoprotein that functions on the viral surface as a homotetramer (Fig. 1A) (31, 32). It is comprised  
94 of an enzymatic head-domain connected to a short stalk region and an *N*-terminal transmembrane  
95 domain. Due to the low abundance of NA in virions, various designs and approaches have been used  
96 to generate rNA for structural and immunological studies as well as vaccine development (21, 33-  
97 36). To examine if the rNA construct design correlates with the biochemical properties and protective  
98 efficacy, we expressed four secreted, soluble rNAs using the NA sequence from an H1N1 vaccine

99 strain, A/Brisbane/02/2018 (N1-BR18). The constructs were designed based on a common approach  
100 that includes the addition of a signal peptide, a 6×His-tag, and a tetramerization motif in place of the  
101 *N*-terminal transmembrane domain of NA (Fig. 1B) (33, 34). For two of the constructs, we combined  
102 the tetramerization domain from the human vasodilator-stimulated phosphoprotein (VASP) with  
103 either the full-ectodomain of N1-BR18 (V35), or the head-domain (V82), and the remaining two (T35  
104 and T82) followed a similar design using the tetrabrachion (TB) tetramerization domain instead (Fig.  
105 1B).

106 The rNAs were expressed using High Five insect cells and isolated from the culture medium  
107 by immobilized metal affinity chromatography. Following the isolation, the four rNAs resolved at the  
108 expected molecular weight by SDS-PAGE, showed high purity based on Coomassie staining, and  
109 reacted with an N1-specific monoclonal antibody (mAb) by immunoblotting (Fig. 1C). In the absence  
110 of reductant (dithiothreitol, DTT), each rNA displayed faster mobility on SDS-PAGE, suggesting that  
111 they possess the proper intramolecular disulfide bonds.

112 Since *N*-linked glycans can influence antigenicity and NA folding (4, 37, 38), we also  
113 analyzed the *N*-linked glycoforms on the rNAs by mass-spectrometry. As expected for a glycoprotein  
114 produced by insect cells, the majority of the *N*-linked glycans on the rNAs were small and mainly  
115 consisted of pauci-mannose and high mannose glycoforms (Fig. 1D). Both rNAs (V82 and T82)  
116 containing the head-domain showed a higher abundance of pauci-mannose and complex glycoforms  
117 (Fig. 1E), whereas fucosylated pauci-mannose glycoforms were more prevalent on the rNAs (V35  
118 and T35) comprised of the full-ectodomain (Fig. 1E), suggesting these are from the stalk region.  
119 Interestingly, the glycoform distribution somewhat differed between V82 and T82, but not V35 and  
120 T35, indicating that the tetramerization domain may influence glycosylation of the smaller rNA  
121 constructs.

122 **Enzymatic properties of N1-BR18 rNAs.** NA only functions in its native tetrameric conformation,  
123 suggesting sialidase activity is a reasonable indicator for the proper NA structural conformation (32).  
124 To compare the sialidase activity of the rNAs we used the synthetic substrate 2'-(4-  
125 methylumbelliferyl)  $\alpha$ -D-N-acetylneuraminic acid (Mu-NANA). The rNAs with the head-domain  
126 (V82 and T82) showed an activity that was ~10-fold higher than the rNAs with the full-ectodomain  
127 (V35 and T35) and much closer to that observed for a similar amount of full-length N1-BR18 in  
128 purified reassortant virus (BR18 $\times$ WSN) that bears the HA and NA genes from BR18 and the internal  
129 genes from the H1N1 strain A/WSN/1933 (Fig. 2A). A Michaelis-Menten kinetic analysis revealed  
130 that the lower activity of V35 and T35 is not associated with a change in the substrate binding affinity,  
131 as the  $K_m$  values of the four rNAs were similar (Fig. 2B and Table 1).

132 To determine whether V35 and T35 possess lower catalytic rates ( $k_{cat}$ ) or a smaller percentage  
133 of enzymatically active rNA in the preparations, we analyzed the rNA preparations using the active-  
134 site titrating agent TR1 (39, 40). TR1 is a modified Mu-NANA compound that only undergoes a  
135 single sialic acid cleavage reaction per enzyme molecule (Fig. 2C), releasing one equivalent of  
136 difluoromethylumbelliferyl alcohol (F<sub>2</sub>Mu) in a burst phase, which can be followed by a slow steady-  
137 state turnover phase for some NAs (40). The TR1 profiles for V82 and T82 resembled full-length N1-  
138 BR18 with a high initial burst that reached a maximum within ~2 minutes (Fig. 2D). V35 and T35 at  
139 higher protein amounts both showed a smaller initial burst followed by a slow steady-state turnover  
140 phase, indicating these rNAs possess a lower proportion of enzymatically active tetramers that likely  
141 possess an alteration in the active site, which can facilitate release of the covalently bound TR1  
142 intermediate. We then calculated the fraction of enzymatically active rNA in each preparation by  
143 plotting the concentration of F<sub>2</sub>Mu released from TR1 by each rNA at three protein concentrations  
144 (Fig. 2E). The results showed that ~50% (slope = ~0.5) of the V82 and T82 preparations are

145 enzymatically active, in line with the percentage (~74%) observed for full-length N1-BR18. In  
146 contrast, only ~5% (slope = ~0.05) of the V35 and T35 preparations reacted with TR1 (Fig. 2E and  
147 Table 1). Using these values to derive the concentrations of active enzyme, the calculated  $k_{\text{cat}}$  was  
148 found to be similar for all four rNAs (Table 1). These results confirm that the designs for T35 and  
149 V35 produce ~90% less functional NA than the V82 and T82 designs, indicating that the proportion  
150 of functional rNA is mainly influenced by the NA domain rather than the tetramerization domain.

151

152 **Analysis of head-domain epitopes on N1-BR18 rNAs.** Based on the significant differences in the  
153 amount of functional NA, we analyzed the antigenic integrity of the rNAs by a sandwich ELISA (41)  
154 using mAbs CD6, 4C4, 1H5 and 4E9, which bind various regions (42-44) in the N1 head-domain  
155 (Fig. 3A). The rNAs were first bound with CD6, 4C4 or 1H5 and then detected using the HRP-  
156 conjugated mAbs 4C4 or 4E9. At an arbitrary concentration of 1  $\mu\text{g/ml}$  all four rNAs were readily  
157 bound by these mAbs and the signals were in line with those obtained for an equivalent amount of  
158 full-length N1-BR18 in purified virions (Fig. 3B). To confirm if these epitopes are preserved over  
159 time, rNAs stored at 4°C for ~4 months were serially diluted and tested in ELISA with mAbs CD6  
160 and 4E9. All the rNAs were effectively detected at concentrations as low as 7.8-62.5 ng/ml (0.78-  
161 6.25 ng/well). V35 and V82 were even detected at lower concentrations (Fig. 3C), suggesting the  
162 head-domain epitopes are slightly better conserved with the VASP tetramerization domain, or that  
163 these rNAs possess a different property than T35 and T82. Despite the subtle differences, the overall  
164 similarity of the binding profiles implies that the head-domain epitopes remain largely intact on the  
165 rNAs even though the percentage of functional rNA differ.



166 **Stability and molecular size analysis of N1-BR18 rNAs.** Stability is a crucial attribute for vaccine  
167 antigens and NA is known to be a labile tetrameric enzyme (17). To test for stability differences, each  
168 rNA was examined by a thermal denaturation analysis and after freeze-thaw-cycling using enzymatic  
169 activity as a read-out. All the rNAs showed similar thermostability profiles and the  $T_{50}$  (temperature  
170 at which the enzymatic activity was reduced by 50%) values were  $\sim 57^{\circ}\text{C}$  (Fig. 4A), far above routine  
171 vaccine manufacturing and storage temperatures. Following multiple freeze-thaw cycles, the rNAs  
172 also did not show evident activity loss (Fig. 4B), indicating the stability of the functional rNAs is  
173 similar for each design.

174 The molecular size of the rNAs was monitored by size-exclusion chromatography (SEC)  
175 within 10 days post-purification and after storage at  $-80^{\circ}\text{C}$  and  $4^{\circ}\text{C}$  for 1, 3 and 6 months. In agreement  
176 with the estimated molecular weights, the newly purified V82 was found to have the smallest  
177 molecular size followed by T82, V35 and T35 (Fig. 4C, upper panel). V35 and V82 also showed a  
178 more prominent early peak, corresponding to a larger molecular size, which tracked with the NA  
179 activity readings (Fig. 4C, lower panel). While all the SEC profiles were similar to the newly purified  
180 rNAs following long-term storage at  $-80^{\circ}\text{C}$ , only T35 and T82 showed clear size stability after storage  
181 at  $4^{\circ}\text{C}$  for 6 months (Fig. 4D). In contrast, V35 and V82 exhibited dramatic shifts in the SEC profiles  
182 at  $4^{\circ}\text{C}$  and the shifts became more prominent in a time-dependent manner (Fig. 4D), indicating that  
183 the VASP tetramerization motif promotes the formation of higher order oligomers or multimers,  
184 likely explaining the higher sensitivity of V35 and V82 observed in ELISA (Fig. 3C). Despite the  
185 extensive molecular size shifts, no loss in enzymatic activity was observed for V35 or V82 after  
186 storage at  $4^{\circ}\text{C}$  (data not shown). These findings demonstrate that the rNAs with the TB tetramerization  
187 motif possess a more stable molecular size than those with the VASP tetramerization motif.

188 **Evaluation of the antibody response and protection elicited by the N1-BR18 rNAs.** The  
189 immunogenicity and protective efficacy of rNAs have been evaluated using a two-dose (prime and  
190 boost) approach in animal models (26, 28, 45, 46). To assess the impact of the construct design on  
191 the rNA protective efficacy, we immunized mice with the rNAs and conducted lethal viral challenge  
192 (Fig. 5A). For the initial evaluation, we measured the NA antibody response in mice that received  
193 either two intramuscular (i.m.) immunizations with 5 µg of rNA adjuvanted with poly(I:C) or one  
194 i.m. immunization with 5 µg or 2 µg of rNA adjuvanted with poly(I:C). Based on the ELISA results  
195 using full length N1-BR18 in purified virus as an antigen, the serum NA-binding antibody titers were  
196 higher in mice that received two immunizations (Fig. 5B). Mice that were immunized with a single  
197 dose showed consistent differences in the NA-binding antibody titers from each rNA with V35  
198 eliciting the strongest response, followed by T82, T35 and V82 (Fig. 5B). The serum NA-inhibition  
199 (NAI) antibody titers, which are considered indicative of protection (12, 16), displayed a similar  
200 pattern where V35 elicited the highest NAI titers, and V82 elicited the lowest with all NAI titers  
201 below the limit of detection (Fig. 5C).

202         Based on the robust antibody responses from the single-dose immunizations, we also included  
203 groups of mice immunized with 0.2 µg of rNA adjuvanted with poly(I:C) in the lethal viral challenge  
204 experiment. In the groups that received two 5 µg doses of rNA or purified BR18×WSN virus, all mice  
205 were protected and displayed no evident weight loss, whereas the control group immunized with PBS  
206 containing poly(I:C) succumbed to the viral challenge (Fig. 5D). In the single-dose groups, all mice  
207 immunized with 5 or 2 µg of V35 survived the viral challenge with little weight loss, and most mice  
208 that received 0.2 µg of V35 also survived with a maximal average weight loss of ~15% (Fig. 5E-G).  
209 T35 and T82 protected almost all the animals at a single dose of 5 and 2 µg, although substantial  
210 weight loss was observed in these groups, and the 0.2 µg dose showed little or no protection (Fig. 5E-

211 G). Consistent with the poor antibody response, V82 provided the least protection across all of the  
212 single-dose immunizations. Together, these results show that the domains included in the rNA design  
213 are crucial for achieving optimal protection, and the unexpected difference in protection from V82  
214 and V35 indicate that enzymatic activity is not necessarily predictive of protection of rNA.

215

## 216 **DISCUSSION**

217 Since the 1990s, the biochemical and immunological properties of rNA have been studied in  
218 some detail (19, 21, 30, 47). These and more recent studies (20, 28, 29, 48) have established that rNA  
219 can be protective and provide cross protection against influenza strains carrying a similar NA but  
220 different HA subtypes, leading to the proposal that rNA could be used to supplement existing  
221 influenza vaccines. However, all the previously reported animal studies used a two-dose (prime and  
222 boost) immunization regimen with high rNA amounts and provided little information on the rNA  
223 quality attributes, which are critical for evaluating a vaccine antigen. The results from our systematic  
224 comparison demonstrate the following: *-i-* Enzymatic properties of rNAs are dependent on the NA  
225 domains included in the construct design; *-ii-* Molecular size stability of the rNA is influenced by the  
226 properties of the tetramerization domain; *-iii-* Single-dose rNA immunizations in mice can provide  
227 full protection against a lethal viral challenge and are more informative for evaluating rNAs; and *-iv-*  
228 Protective efficacy can substantially differ between rNA designs with similar attributes, indicating  
229 that the rNA immunogenicity is mainly determined by the combination of the NA and the  
230 tetramerization domains. These findings show that the rNA design is critical for optimal protective  
231 efficacy and that rNA antigens being developed to improve influenza vaccines would benefit from a  
232 comprehensive evaluation.

233           The interesting observation that rNA designs including the head-domain (V82 and T82)  
234   generate a higher percentage of functional rNA than designs containing the full-ectodomain (V35 and  
235   T35) suggests that the stalk region impairs the function of the head-domain. Earlier studies also  
236   reported that the presence of the stalk significantly reduces the activity of a secreted NA without a  
237   tetramerization domain, implying that head-domain assembly is most efficient when the stalk is  
238   attached to a lipid bilayer by the tetrameric amphipathic transmembrane (49, 50). To complement the  
239   absence of the transmembrane domain, the four rNAs in this study contain an *N*-terminal  
240   tetramerization domain and they are all recognized similarly by various N1 head-specific mAbs,  
241   indicating multiple epitopes in the head-domain are largely preserved despite the activity differences.  
242   In addition, the rNA designs (V35 and T35) that produce the lowest percentage of functional NA  
243   elicited comparable (T35 versus T82) or higher antibody response and protection (V35 versus V82).  
244   All these results raise the question of what causes the decrease in enzymatic activity of the rNAs  
245   containing the full-ectodomain. Previous work has shown that full-length NA assembles through a  
246   cooperative process that requires compatibility between the head and transmembrane domain and that  
247   formation of tetramer-dependent central Ca<sup>2+</sup> binding pocket is essential for NA activity (38, 51). We  
248   speculate that the tetramerization domains attached to the stalk are less compatible with the head  
249   domain than the native transmembrane region, resulting in the suboptimal formation of the central  
250   Ca<sup>2+</sup> binding pocket and hence the lower activity.

251           We also observed that the tetramerization domain from VASP introduces more instability in  
252   the molecular size of the rNAs than the one from TB. This phenotype was especially evident during  
253   storage at 4°C where V35 and V82 showed time-dependent shifts in molecular size, which is  
254   indicative of higher order oligomer or multimer formation. The molecular size increase did not  
255   coincide with a loss in activity (data not shown), suggesting that the number of functional active sites

256 in the higher order V35 and V82 oligomers did not change. The more stable T35 and T82 might be  
257 preferred from the perspective of vaccine manufacture as most influenza vaccines are commonly  
258 stored at 4°C. However, it is unknown if the increase in molecular size, as observed for V35 and V82  
259 stored at 4°C, is a beneficial attribute for immunogenicity since our protection experiments were  
260 performed with rNAs stored at -80°C prior to the shift in size. Protection experiments aimed at  
261 assessing the impact of the molecular size increase on the immune response and protection will be  
262 reported in a subsequent study, which will help to determine the rNA storage requirements

263         With the common two-dose approach and high amounts of rNA the protection in mice were  
264 almost indiscernible, but with the single-dose immunizations clear differences were observed in the  
265 protection from the rNAs, suggesting that multiple doses of high amounts may mask difference in the  
266 quality of the rNA antigens. Following the single-dose immunizations, the highest antibody titers and  
267 protective efficacy were observed for V35, which produces a low percentage of enzymatically active  
268 NA, whereas the poorest immune response was observed for V82 that produces a high percentage of  
269 enzymatically active NA. In contrast, similar antibody titers and protective efficacy were observed  
270 for T35 and T82. The differences in the protective efficacy between V82 and the other three rNAs,  
271 especially T82, were very unexpected. We did observe a higher prevalence of a particular glycoform  
272 on V82 compared to T82. However, it is unlikely that this minor modification of an insect cell  
273 glycoform is solely responsible for the low immunogenicity of V82. The probable factors could be  
274 the smaller molecular size of V82, the propensity for V82 to form multimers, and the immunogenicity  
275 of the charged VASP domain in the context of the smaller NA-head domain. Our results emphasize  
276 that enzymatically active rNAs are not necessarily the most immunogenic, which is significantly  
277 different than the common belief that enzymatic activity is an ideal attribute for assessing NA quality.

278 In summary, our findings highlight the necessity to carefully select the elements included in  
279 the design of rNAs, as different attributes are influenced by the choice of the tetramerization and NA  
280 domains. Our data also indicate that NA activity may not be the best attribute for assessing the quality  
281 of rNAs. Based on the clear difference across the four recombinant N1 constructs, future studies are  
282 needed to evaluate the designs of other vaccine relevant rNAs, to identify additional methods for  
283 optimizing rNA production and to assess whether supplementing influenza vaccines with rNA can  
284 enhance the immunogenicity and reduce the HA dose amounts needed in the vaccine.

285

## 286 **MATERIALS AND METHODS**

287 **Cells and viruses.** High Five insect cells (Invitrogen) maintained in Express Five serum free medium  
288 (Life Technologies) were used for the N1-BR18 rNA expression. Recombinant baculoviruses that  
289 express the N1-BR18 rNAs (see Fig. 1B for the rNA construct design) were produced by GenScript  
290 Inc. Recombinant influenza viruses were rescued in Madin-Darby canine kidney cells and human  
291 embryonic kidney 293T cells using reverse genetics as previously reported (52, 53). These viruses  
292 included BR18×WSN, which bears the HA and NA genes from BR18 (H1N1) and the internal genes  
293 from A/WSN/1933 (WSN, H1N1), H6N1<sub>BR18</sub>×WSN and H6N1<sub>BR18</sub>×PR8, which bear the HA gene  
294 from A/turkey/Massachusetts/3740/1965 (H6N2), the NA gene from BR18, and the internal genes  
295 from WSN and A/Puerto Rico/8/1934 (PR8, H1N1), respectively. The rescued viruses were  
296 propagated in 9-11-day-old specific pathogen-free embryonated chicken eggs. The median lethal dose  
297 (LD<sub>50</sub>) of H6N1<sub>BR18</sub> in mice was determined for the lethal viral challenge. Viruses were also  
298 inactivated with  $\beta$ -propiolactone (Sigma) and purified by sucrose gradient centrifugation for *in vitro*  
299 assays and the animal study.

300 **rNA expression and purification.** High Five insect cells were grown to a density of  $\sim 2 \times 10^6$  cell/ml  
301 in shaker flasks at 120 rpm and 27.5°C prior to infection with each recombinant baculovirus at a

302 multiplicity of infection of ~2.0-5.0. At 72-96 h post-infection, when the NA activity plateaued, the  
303 cell culture supernatant was clarified, concentrated and exchanged to a pH 8.0 buffer (50 mM Tris,  
304 300 mM NaCl, 1 mM CaCl<sub>2</sub>) by tangential flow filtration using a cartridge with a 30-kD molecular  
305 weight cutoff. The buffer was then adjusted to contain 40 mM imidazole and the rNAs were purified  
306 with a HisTrap<sup>TM</sup> FF 1 ml column (GE Healthcare) using an Akta Start protein purification system  
307 (Cytiva). Alternatively, rNAs were purified using a HisTrap<sup>TM</sup> FF 5 ml column (GE Healthcare) from  
308 the cell culture supernatant that was clarified but not concentrated or buffer exchanged. The column  
309 was washed with a pH 8.0 buffer (50 mM Tris, 300 mM NaCl, 1 mM CaCl<sub>2</sub>) containing 40 mM  
310 imidazole and the bound protein was eluted using a pH 8.0 buffer (50 mM Tris, 300 mM NaCl, 1 mM  
311 CaCl<sub>2</sub>) supplemented with 250 mM imidazole. Fractions containing the rNAs were pooled and  
312 exchanged into in a pH 6.5 buffer (50 mM Tris, 150 mM NaCl, 1 mM CaCl<sub>2</sub>, 5% glycerol) using  
313 15ml centrifugal filters with a 30-kD molecular weight cutoff (Millipore) and the rNA concentration  
314 was measured and adjusted to ~1.0 mg/ml. Each rNA was then aliquoted and stored at -80°C or 4°C  
315 for subsequent assays.

316 **SDS-PAGE and Western blot.** rNAs (2 µg/lane for Coomassie, 0.2 µg/lane for Western blot) were  
317 mixed with 2× sample buffer containing 50 mM DTT, heated at 50°C for 10 min, and resolved by 4-  
318 12 % polyacrylamide Tris-Glycine SDS-PAGE wedge gels (Thermo Fisher Scientific). Gels were  
319 either stained with simple blue (Thermo Fisher Scientific) or transferred to a 0.45-µm pore PVDF  
320 membrane (Life Technologies) at 65 V for 1h. The membrane was blocked with the AzureSpectra  
321 Fluorescence Blot Blocking Buffer (Azure Biosystems), and incubated with 1 µg/ml N1-specific  
322 rabbit mAb (Sino Biological) and AzureSpectra 700 goat-anti-rabbit IgG (Azure Biosystems). The  
323 Coomassie gels and immunoblots were then imaged using an Azure C600 Bioanalytical Imaging  
324 System (Azure Biosystems).

325 **Glycan analysis.** Each rNA was exchanged into 50 mM ammonium bicarbonate buffer, pH 8.0, using  
326 0.5 ml centrifugal filters (Millipore). The rNA samples were reduced by the addition of 5 mM DTT  
327 followed by a 30 min incubation at 60°C. The cysteines were then alkylated by incubation with 15  
328 mM iodoacetamide for 30 min at room temperature in the dark. The alkylation reactions were  
329 quenched by adding 25 mM DTT, and 25 µg of each rNA sample was digested at 37°C overnight with  
330 trypsin (Promega). After 10 min at 95°C to denature the trypsin, the samples were incubated at 37°C  
331 overnight with PNGase F (New England BioLabs) to release the glycans. Glycan purification,  
332 permethylation, data collection and analysis were done as described previously (54), and the  
333 glycoform assignments were determined using a reference library of glycans known to be present in  
334 insect cells.

335 **ELISA.** A sandwich ELISA was performed as previously described (41) to confirm the presence of  
336 various epitopes on N1-BR18 rNAs. Briefly, N1-specific mAbs CD6, 4C4, 1H5 (42-44) and an N2-  
337 specific mAb B10 (38) were coated onto Immulon® 2HB flat bottom microtiter plates (Thermo Fisher  
338 Scientific) at 1 µg/well. After blocking with 15% fetal bovine serum (FBS) (Atlanta Biologics) in  
339 PBS, diluted N1-BR18 rNAs and BR18×WSN virus were added and incubated at 37°C for 1 h,  
340 followed by washing and incubation with HRP-conjugated mAb 4E9 or 4C4 at 37°C for 1 h. Plates  
341 were then developed using the substrate *o*-phenylenediamine dihydrochloride (OPD; Sigma) for 10  
342 min, the reactions were stopped with 1 N H<sub>2</sub>SO<sub>4</sub>, and the absorbance values at 490 nm (Abs<sub>490</sub>) were  
343 read. To measure the NA-binding antibody titers in mouse serum samples, purified H6N1<sub>BR18</sub>×PR8  
344 virus was coated onto plates at 0.5 µg/well of the total viral protein. After blocking with 15% FBS in  
345 PBS, 2-fold serially diluted serum samples were added and incubated at 37°C for 1 h. The plates were  
346 then washed, HRP-conjugated goat-anti-mouse IgG (Sigma) was added, and the plates were incubated



347 at 37°C for 1h. The plates were developed the same way as for the sandwich ELISA., The cutoff  
348 Abs<sub>490</sub> value was set at 0.08.

349 **Enzymatic activity assay.** To examine the NA activity, rNAs and BR18×WSN virus were diluted in  
350 25 µl in 96-well, black wall, clear bottom plates (Corning) and warmed to 37°C. The reaction was  
351 initiated by mixing each sample with 175 µl of substrate solution [170 µl 0.1 M KH<sub>2</sub>PO<sub>4</sub> containing  
352 1 mM CaCl<sub>2</sub> (pH 6.0) and 5 µl of 2 mM Mu-NANA]. The fluorescence was measured using a Cytation  
353 5 Cell Imaging Multi-Mode Reader (Biotek) at 37°C for 10 min using 30 sec intervals and a 365 nm  
354 excitation wavelength and a 450 nm emission wavelength. The NA activity was determined based on  
355 the slope of the early linear region in the emission versus time graph.

356 The Michaelis-Menten kinetic analysis was performed by diluting the rNAs and BR18×WSN  
357 virus to a known concentration and measuring the enzymatic activity with the presence of increasing  
358 concentrations of Mu-NANA the reached saturation. The  $V_{\max}$  and  $K_m$  values were calculated by  
359 analyzing the nonlinear fitting curves with GraphPad Prism version 8.0 (GraphPad Software). The  
360  $k_{\text{cat}}$  values were calculated using the  $V_{\max}$  value, the rNA concentration and a 4-methylumbelliferone  
361 (Sigma) standard curve.

362 **TR1 assay.** The TR1 assay was performed as previously reported (40) with modifications. In brief,  
363 F<sub>2</sub>Mu was 2-fold serially diluted in 96-well, black wall, clear bottom plates (Corning), starting from  
364 1.0 µM, in 200 µl pH 7.6 buffer (50 mM Tris, 20 mM CaCl<sub>2</sub>). The fluorescence signals were read at  
365 a 365 nm excitation wavelength and a 450 nm emission wavelength using a Cytation 5 Cell Imaging  
366 Multi-Mode Reader (Biotek) and a standard curve was created. The rNAs and were serially diluted  
367 to 20 µl using pH 7.6 buffer (50 mM Tris, 20 mM CaCl<sub>2</sub>) in 96-well, black wall, clear bottom plates  
368 (Corning), and the reactions were initiated by adding 180 µl TR1 solution (175 µl 50 mM Tris pH 7.6  
369 containing 20 mM CaCl<sub>2</sub>, 5 µl 1 mM TR1). The fluorescence signals were monitored continuously

370 for 30 min at 30 sec intervals, and the number of the active NA catalytic sites was calculated based  
371 on the signals reached at the plateau and the standard calibration equation.

372 **rNA stability analysis.** The thermostability was monitored by incubating the rNAs at 37, 43.2, 52,  
373 54.1, 56.4, 59.6, 63.7, 67.1 and 70°C for 10 min in a C1000 Touch™ Cyclor (Bio-Rad) and measuring  
374 the enzymatic activity with the Mu-NANA assay. The data were then analyzed using nonlinear fitting  
375 curves to calculate the  $T_{50}$  values on GraphPad Prism version 8.0 (GraphPad Software). The freeze-  
376 thaw stability was determined by measuring the enzymatic activity of rNAs following 5 cycles of  
377 freezing for 10 min on dry ice and thawing briefly at 37°C, the enzymatic activity of the treated  
378 samples was normalized to that of untreated samples. To examine the molecular size stability at the  
379 routine storage temperature, rNAs stored at -80°C were thawed at 1, 3, and 6-months and analyzed by  
380 SEC. Briefly, 10 µl of each rNA, adjusted to 0.5 mg/ml with the pH 6.5 buffer (50 mM Tris, 150 mM  
381 NaCl, 1 mM CaCl<sub>2</sub>, 5% glycerol) was analyzed using an Agilent 1260 prime HPLC equipped with an  
382 AdvanceBio SEC 300Å column, a variable wavelength detector set at 220 and 280 nm, and a fraction  
383 collector, run at a flow rate of 1 ml/min. The molecular weights for each rNA were estimated using  
384 an AdvanceBio SEC 300Å protein standard (Agilent) of known molecular weights that was included  
385 in the run and the presence of NA in each fraction was measured with the Mu-NANA assay.

386 **Animal study.** Mouse experiments were conducted to examine the immunogenicity and protective  
387 efficacy of N1-BR18 rNAs against lethal viral challenge. For the two-dose immunization regimen,  
388 DBA/2 mice (female, 6-wk old; The Jackson Laboratory; n=8 per group) were immunized i.m. with  
389 each rNA 5 µg mixed with 5 µg poly(I:C) adjuvant (Sigma) and boosted with the same dose of rNA  
390 and poly(I:C) at a 21-day interval. On day 21 post-boost, 3 mice from each group were euthanized,  
391 and the blood was collected for measuring the NA-binding antibodies with ELISA and NAI antibodies  
392 with ELLA. The remaining 5 mice per group were challenged intranasally (i.n.) with 10 LD<sub>50</sub> of

393 H6N1<sub>BR18</sub>×PR8 in 50 µl of PBS. These mice were monitored for weight loss and mortality for up to  
394 14 days, and mice that lost 25% weight were euthanized. Mice primed and boosted with 5 µg  
395 inactivated, purified BR18×WSN virus adjuvanted with 5 µg poly(I:C) were included as the positive  
396 control and mice receiving PBS containing 5 µg poly(I:C) were included as the negative control. For  
397 the single-dose regimen, DBA/2 mice (female, 8-wk old; The Jackson Laboratory; n=8 for the 5 and  
398 2 µg rNA groups, n=4 for the 0.2 µg rNA groups) received a single i.m. immunization of rNAs at 5,  
399 2, 0.2 µg, or PBS mixed with 5 µg poly(I:C). On day 28 post-immunization, 3 mice from each group  
400 immunized with 5 or 2 µg rNA were euthanized for blood collection and the NA serum antibody titers  
401 were measured. The remaining animals (n=5 or 4) in each group were challenged and monitored  
402 similarly. Federal guidelines and protocols approved by the Food and Drug Administration  
403 Institutional Animal Care and Use Committee were followed in the animal experiments.

#### 404 **NAI assay**

405 The NAI antibody titers in mouse serum samples were measured with ELLA as described previously  
406 (55). Serial dilutions of the serum samples were mixed with a predetermined amount of virus diluted  
407 in pH 6.5 MES buffer (KD Medical) containing 1% bovine serum albumin (Sigma) and 0.5% Tween-  
408 20 (Sigma). The mixture was added to 96-well plates (Thermo Fisher Scientific) coated with 2.5  
409 µg/well of fetuin (Sigma) and incubated overnight at 37°C. Plates were washed with PBS containing  
410 0.05% Tween-20 (PBST), followed by adding HRP-conjugated peanut agglutinin (Sigma). Plates  
411 were incubated at room temperature for 2 h in the dark and washed with PBST before the addition of  
412 the OPD substrate. The reaction was stopped by adding 1 N H<sub>2</sub>SO<sub>4</sub> and Abs<sub>490</sub> values were read, the  
413 antibody titer was expressed as the reciprocal of the highest dilution that exhibited ≥ 50% inhibition  
414 of NA activity.

## 415 **ACKNOWLEDGEMENTS**

416 This work was supported by intramural funds from the Food and Drug Administration. We  
417 thank St. Jude Children's Research Hospital for providing plasmids that were used to rescue viruses.  
418 We thank Paul Carney and James Stevens from the Centers for Disease Control and Prevention for  
419 technical help and providing the N2 protein used in the study. We are indebted to staff of the Division  
420 of Veterinary Services, Center for Biologics Evaluation and Research, Food and Drug  
421 Administration, for excellent animal care. The findings and conclusions in this report are those of the  
422 authors and do not necessarily represent the views of the Food and Drug Administration.

423 R.D. and H.W. designed the study. J.G., L.K., L.P., T.M., J.P., Z.G. and H.W. performed  
424 and/or helped with the experiments. R.D. and H.W. wrote the paper. S.G.W., J.C., R.D. and H.W.  
425 edited the paper.

426 Disclosures: S.G.W. and Z.G. are named contributors to a patent application submitted by the  
427 University of British Columbia concerning the development and use of TR1 as an active site titrant  
428 for influenza NA. The authors have no additional financial interests.

429

## 430 **REFERENCES**

- 431 1. Wu NC, Zost SJ, Thompson AJ, Oyen D, Nycholat CM, McBride R, Paulson JC, Hensley SE, Wilson IA.  
432 2017. A structural explanation for the low effectiveness of the seasonal influenza H3N2 vaccine. *PLoS*  
433 *Pathog* 13:e1006682.
- 434 2. Paules CI, Sullivan SG, Subbarao K, Fauci AS. 2018. Chasing Seasonal Influenza - The Need for a  
435 Universal Influenza Vaccine. *N Engl J Med* 378:7-9.
- 436 3. Zost SJ, Parkhouse K, Gumina ME, Kim K, Diaz Perez S, Wilson PC, Treanor JJ, Sant AJ, Cobey S, Hensley  
437 SE. 2017. Contemporary H3N2 influenza viruses have a glycosylation site that alters binding of  
438 antibodies elicited by egg-adapted vaccine strains. *Proc Natl Acad Sci U S A* 114:12578-12583.
- 439 4. Ostbye H, Gao J, Martinez MR, Wang H, de Gier JW, Daniels R. 2020. N-Linked Glycan Sites on the  
440 Influenza A Virus Neuraminidase Head Domain Are Required for Efficient Viral Incorporation and  
441 Replication. *J Virol* 94.
- 442 5. Gaymard A, Le Briand N, Frobert E, Lina B, Escuret V. 2016. Functional balance between  
443 neuraminidase and haemagglutinin in influenza viruses. *Clin Microbiol Infect* 22:975-983.
- 444 6. Dou D, Revol R, Ostbye H, Wang H, Daniels R. 2018. Influenza A Virus Cell Entry, Replication, Virion  
445 Assembly and Movement. *Front Immunol* 9:1581.

- 446 7. Murphy BR, Chalhub EG, Nusinoff SR, Chanock RM. 1972. Temperature-sensitive mutants of influenza  
447 virus. II. Attenuation of ts recombinants for man. *J Infect Dis* 126:170-8.
- 448 8. Schulman JL, Khakpour M, Kilbourne ED. 1968. Protective effects of specific immunity to viral  
449 neuraminidase on influenza virus infection of mice. *J Virol* 2:778-86.
- 450 9. Allan WH, Madeley CR, Kendal AP. 1971. Studies with avian influenza A viruses: cross protection  
451 experiments in chickens. *J Gen Virol* 12:79-84.
- 452 10. Monto AS, Kendal AP. 1973. Effect of neuraminidase antibody on Hong Kong influenza. *Lancet* 1:623-  
453 5.
- 454 11. Couch RB, Kasel JA, Gerin JL, Schulman JL, Kilbourne ED. 1974. Induction of partial immunity to  
455 influenza by a neuraminidase-specific vaccine. *J Infect Dis* 129:411-20.
- 456 12. Memoli MJ, Shaw PA, Han A, Czajkowski L, Reed S, Athota R, Bristol T, Fargis S, Risos K, Powers JH,  
457 Davey RT, Jr., Taubenberger JK. 2016. Evaluation of Antihemagglutinin and Antineuraminidase  
458 Antibodies as Correlates of Protection in an Influenza A/H1N1 Virus Healthy Human Challenge Model.  
459 *mBio* 7:e00417-16.
- 460 13. Air GM. 2012. Influenza neuraminidase. *Influenza Other Respi Viruses* 6:245-56.
- 461 14. Kilbourne ED, Johansson BE, Grajower B. 1990. Independent and disparate evolution in nature of  
462 influenza A virus hemagglutinin and neuraminidase glycoproteins. *Proc Natl Acad Sci U S A* 87:786-  
463 90.
- 464 15. Krammer F, Fouchier RAM, Eichelberger MC, Webby RJ, Shaw-Saliba K, Wan H, Wilson PC, Compans  
465 RW, Skountzou I, Monto AS. 2018. NAction! How Can Neuraminidase-Based Immunity Contribute to  
466 Better Influenza Virus Vaccines? *mBio* 9.
- 467 16. Eichelberger MC, Monto AS. 2019. Neuraminidase, the Forgotten Surface Antigen, Emerges as an  
468 Influenza Vaccine Target for Broadened Protection. *J Infect Dis* 219:S75-S80.
- 469 17. Wang H, Dou D, Ostbye H, Revol R, Daniels R. 2019. Structural restrictions for influenza  
470 neuraminidase activity promote adaptation and diversification. *Nat Microbiol* 4:2565-2577.
- 471 18. Brett IC, Johansson BE. 2005. Immunization against influenza A virus: comparison of conventional  
472 inactivated, live-attenuated and recombinant baculovirus produced purified hemagglutinin and  
473 neuraminidase vaccines in a murine model system. *Virology* 339:273-80.
- 474 19. Deroo T, Jou WM, Fiers W. 1996. Recombinant neuraminidase vaccine protects against lethal  
475 influenza. *Vaccine* 14:561-9.
- 476 20. Job ER, Ysenbaert T, Smet A, Christopoulou I, Strugnell T, Oloo EO, Oomen RP, Kleanthous H, Vogel  
477 TU, Saelens X. 2018. Broadened immunity against influenza by vaccination with computationally  
478 designed influenza virus N1 neuraminidase constructs. *NPJ Vaccines* 3:55.
- 479 21. Martinet W, Saelens X, Deroo T, Neiryneck S, Contreras R, Min Jou W, Fiers W. 1997. Protection of  
480 mice against a lethal influenza challenge by immunization with yeast-derived recombinant influenza  
481 neuraminidase. *Eur J Biochem* 247:332-8.
- 482 22. Johansson BE, Matthews JT, Kilbourne ED. 1998. Supplementation of conventional influenza A  
483 vaccine with purified viral neuraminidase results in a balanced and broadened immune response.  
484 *Vaccine* 16:1009-15.
- 485 23. Johansson BE, Bucher DJ, Kilbourne ED. 1989. Purified influenza virus hemagglutinin and  
486 neuraminidase are equivalent in stimulation of antibody response but induce contrasting types of  
487 immunity to infection. *J Virol* 63:1239-46.
- 488 24. Kilbourne ED, Couch RB, Kasel JA, Keitel WA, Cate TR, Quarles JH, Grajower B, Pokorny BA, Johansson  
489 BE. 1995. Purified influenza A virus N2 neuraminidase vaccine is immunogenic and non-toxic in  
490 humans. *Vaccine* 13:1799-803.
- 491 25. Izikson R, Leffell DJ, Bock SA, Patriarca PA, Post P, Dunkle LM, Cox MM. 2015. Randomized  
492 comparison of the safety of Flublok((R)) versus licensed inactivated influenza vaccine in healthy,  
493 medically stable adults  $\geq$  50 years of age. *Vaccine* 33:6622-8.

- 494 26. Johansson BE, Grajower B, Kilbourne ED. 1993. Infection-permissive immunization with influenza  
495 virus neuraminidase prevents weight loss in infected mice. *Vaccine* 11:1037-9.
- 496 27. Johansson BE, Pokorny BA, Tiso VA. 2002. Supplementation of conventional trivalent influenza  
497 vaccine with purified viral N1 and N2 neuraminidases induces a balanced immune response without  
498 antigenic competition. *Vaccine* 20:1670-4.
- 499 28. Wohlbold TJ, Nachbagauer R, Xu H, Tan GS, Hirsh A, Brokstad KA, Cox RJ, Palese P, Krammer F. 2015.  
500 Vaccination with adjuvanted recombinant neuraminidase induces broad heterologous, but not  
501 heterosubtypic, cross-protection against influenza virus infection in mice. *mBio* 6:e02556.
- 502 29. McMahon M, Strohmeier S, Rajendran M, Capuano C, Ellebedy AH, Wilson PC, Krammer F. 2020.  
503 Correctly folded - but not necessarily functional - influenza virus neuraminidase is required to induce  
504 protective antibody responses in mice. *Vaccine* 38:7129-7137.
- 505 30. Johansson BE, Price PM, Kilbourne ED. 1995. Immunogenicity of influenza A virus N2 neuraminidase  
506 produced in insect larvae by baculovirus recombinants. *Vaccine* 13:841-5.
- 507 31. Varghese JN, Laver WG, Colman PM. 1983. Structure of the influenza virus glycoprotein antigen  
508 neuraminidase at 2.9 Å resolution. *Nature* 303:35-40.
- 509 32. Paterson RG, Lamb RA. 1990. Conversion of a class II integral membrane protein into a soluble and  
510 efficiently secreted protein: multiple intracellular and extracellular oligomeric and conformational  
511 forms. *J Cell Biol* 110:999-1011.
- 512 33. Xu X, Zhu X, Dwek RA, Stevens J, Wilson IA. 2008. Structural characterization of the 1918 influenza  
513 virus H1N1 neuraminidase. *J Virol* 82:10493-501.
- 514 34. Margine I, Palese P, Krammer F. 2013. Expression of functional recombinant hemagglutinin and  
515 neuraminidase proteins from the novel H7N9 influenza virus using the baculovirus expression  
516 system. *J Vis Exp* doi:10.3791/51112:e51112.
- 517 35. Johansson BE. 1999. Immunization with influenza A virus hemagglutinin and neuraminidase  
518 produced in recombinant baculovirus results in a balanced and broadened immune response  
519 superior to conventional vaccine. *Vaccine* 17:2073-80.
- 520 36. Dai M, Guo H, Dortmans JC, Dekkers J, Nordholm J, Daniels R, van Kuppeveld FJ, de Vries E, de Haan  
521 CA. 2016. Identification of Residues That Affect Oligomerization and/or Enzymatic Activity of  
522 Influenza Virus H5N1 Neuraminidase Proteins. *J Virol* 90:9457-70.
- 523 37. Wang N, Glidden EJ, Murphy SR, Pearse BR, Hebert DN. 2008. The cotranslational maturation  
524 program for the type II membrane glycoprotein influenza neuraminidase. *J Biol Chem* 283:33826-37.
- 525 38. Wan H, Gao J, Yang H, Yang S, Harvey R, Chen YQ, Zheng NY, Chang J, Carney PJ, Li X, Plant E, Jiang L,  
526 Couzens L, Wang C, Strohmeier S, Wu WW, Shen RF, Krammer F, Cipollo JF, Wilson PC, Stevens J, Wan  
527 XF, Eichelberger MC, Ye Z. 2019. The neuraminidase of A(H3N2) influenza viruses circulating since  
528 2016 is antigenically distinct from the A/Hong Kong/4801/2014 vaccine strain. *Nat Microbiol* 4:2216-  
529 2225.
- 530 39. Gao Z, Niikura M, Withers SG. 2017. Ultrasensitive Fluorogenic Reagents for Neuraminidase Titration.  
531 *Angew Chem Int Ed Engl* 56:6112-6116.
- 532 40. Gao Z, Robinson K, Skowronski DM, De Serres G, Withers SG. 2020. Quantification of the total  
533 neuraminidase content of recent commercially-available influenza vaccines: Introducing a  
534 neuraminidase titration reagent. *Vaccine* 38:715-718.
- 535 41. Wan H, Sultana I, Couzens LK, Mindaye S, Eichelberger MC. 2017. Assessment of influenza A  
536 neuraminidase (subtype N1) potency by ELISA. *J Virol Methods* 244:23-28.
- 537 42. Wan H, Yang H, Shore DA, Garten RJ, Couzens L, Gao J, Jiang L, Carney PJ, Villanueva J, Stevens J,  
538 Eichelberger MC. 2015. Structural characterization of a protective epitope spanning A(H1N1)pdm09  
539 influenza virus neuraminidase monomers. *Nat Commun* 6:6114.
- 540 43. Wan H, Gao J, Xu K, Chen H, Couzens LK, Rivers KH, Easterbrook JD, Yang K, Zhong L, Rajabi M, Ye J,  
541 Sultana I, Wan XF, Liu X, Perez DR, Taubenberger JK, Eichelberger MC. 2013. Molecular basis for broad

- 542 neuraminidase immunity: conserved epitopes in seasonal and pandemic H1N1 as well as H5N1  
543 influenza viruses. *J Virol* 87:9290-300.
- 544 44. Jiang L, Fantoni G, Couzens L, Gao J, Plant E, Ye Z, Eichelberger MC, Wan H. 2016. Comparative  
545 Efficacy of Monoclonal Antibodies That Bind to Different Epitopes of the 2009 Pandemic H1N1  
546 Influenza Virus Neuraminidase. *J Virol* 90:117-28.
- 547 45. Kilbourne ED, Pokorny BA, Johansson B, Brett I, Milev Y, Matthews JT. 2004. Protection of mice with  
548 recombinant influenza virus neuraminidase. *J Infect Dis* 189:459-61.
- 549 46. Bosch BJ, Bodewes R, de Vries RP, Kreijtz JH, Bartelink W, van Amerongen G, Rimmelzwaan GF, de  
550 Haan CA, Osterhaus AD, Rottier PJ. 2010. Recombinant soluble, multimeric HA and NA exhibit  
551 distinctive types of protection against pandemic swine-origin 2009 A(H1N1) influenza virus infection  
552 in ferrets. *J Virol* 84:10366-74.
- 553 47. Mather KA, White JF, Hudson PJ, McKimm-Breschkin JL. 1992. Expression of influenza neuraminidase  
554 in baculovirus-infected cells. *Virus Res* 26:127-39.
- 555 48. Giurgea LT, Park JK, Walters KA, Scherler K, Cervantes-Medina A, Freeman A, Rosas LA, Kash JC,  
556 Taubenberger JK, Memoli MJ. 2021. The effect of calcium and magnesium on activity,  
557 immunogenicity, and efficacy of a recombinant N1/N2 neuraminidase vaccine. *NPJ Vaccines* 6:48.
- 558 49. da Silva DV, Nordholm J, Madjo U, Pfeiffer A, Daniels R. 2013. Assembly of subtype 1 influenza  
559 neuraminidase is driven by both the transmembrane and head domains. *J Biol Chem* 288:644-53.
- 560 50. Nordholm J, da Silva DV, Damjanovic J, Dou D, Daniels R. 2013. Polar residues and their positional  
561 context dictate the transmembrane domain interactions of influenza A neuraminidases. *J Biol Chem*  
562 288:10652-60.
- 563 51. da Silva DV, Nordholm J, Dou D, Wang H, Rossman JS, Daniels R. 2015. The influenza virus  
564 neuraminidase protein transmembrane and head domains have coevolved. *J Virol* 89:1094-104.
- 565 52. Neumann G, Watanabe T, Ito H, Watanabe S, Goto H, Gao P, Hughes M, Perez DR, Donis R, Hoffmann  
566 E, Hobom G, Kawaoka Y. 1999. Generation of influenza A viruses entirely from cloned cDNAs. *Proc  
567 Natl Acad Sci U S A* 96:9345-50.
- 568 53. Sandbulte MR, Gao J, Straight TM, Eichelberger MC. 2009. A miniaturized assay for influenza  
569 neuraminidase-inhibiting antibodies utilizing reverse genetics-derived antigens. *Influenza Other  
570 Respir Viruses* 3:233-40.
- 571 54. Parsons LM, Bouwman KM, Azurmendi H, de Vries RP, Cipollo JF, Verheije MH. 2019. Glycosylation  
572 of the viral attachment protein of avian coronavirus is essential for host cell and receptor binding. *J  
573 Biol Chem* 294:7797-7809.
- 574 55. Gao J, Couzens L, Eichelberger MC. 2016. Measuring Influenza Neuraminidase Inhibition Antibody  
575 Titers by Enzyme-linked Lectin Assay. *J Vis Exp* doi:10.3791/54573.

576

577

TABLE 1 Enzymatic properties of N1-BR18 rNAs

578

579

580

581

582

583

584

585

| <b>rNAs</b>        | <b><math>K_m</math><br/>(<math>\mu\text{M}</math>)</b> | <b>Apparent <math>k_{cat}</math><br/>(<math>\text{s}^{-1}</math>)</b> | <b>Functional rNAs<br/>(%)</b> | <b>True <math>k_{cat}</math><br/>(<math>\text{s}^{-1}</math>)</b> |
|--------------------|--------------------------------------------------------|-----------------------------------------------------------------------|--------------------------------|-------------------------------------------------------------------|
| V35                | 48.6 <sup>a</sup>                                      | 12                                                                    | 6.8                            | 176                                                               |
| V82                | 43.1                                                   | 130                                                                   | 50                             | 260                                                               |
| T35                | 45.6                                                   | 10                                                                    | 4.3                            | 232                                                               |
| T82                | 42.7                                                   | 123                                                                   | 46                             | 267                                                               |
| Virus <sup>b</sup> | 44.6                                                   | 221                                                                   | 74                             | 298                                                               |

<sup>a</sup>Mean from three technical repeats.

<sup>b</sup>Purified BR18×WSN virus, which contains ~10% NA, was used as a control.



586 **Figure legend**

587 **Figure 1.** Characterization of N1-BR18 rNAs. (A) A schematic diagram of full-length N1-BR18  
588 showing the trans-membrane (TM) domain and the ectodomain, which includes the NA head and  
589 stalk. Potential *N*-linked glycosylation sites are labeled (green). Sites 88 and 235 are not visible in the  
590 displayed view. (B) Diagrams of the N1-BR18 rNA construct designs. V35 and T35 contain the full-  
591 ectodomain of N1-BR18 (residues 35-469) connected to the tetramerization domains from VASP  
592 (V35) or TB (T35). V82 and T82 are designed similarly using the N1-BR18 head-domain (residues  
593 82-469). Structures of tetramerization domains from VASP (PDB ID: 1USE) and TB (PDB ID: 1FE6)  
594 are shown in a box. (C) Representative images of a Coomassie stained SDS-PAGE gel containing the  
595 rNAs (2  $\mu$ g/lane) and an immunoblot (0.2  $\mu$ g NA/lane) resolved using a N1-specific mAb. The rNAs  
596 were untreated or reduced with DTT prior to resolution by SDS-PAGE. (D) Spectra of PNGaseF-  
597 released *N*-linked permethylated glycans from each rNA. Structures of the most abundant glycoforms  
598 are shown, mannose (grey circles), *N*-acetyl glucosamine (black squares) and fucose (grey triangle).  
599 (E) Graph displaying the abundance of the different glycoform subtypes. Mannose, Man; hexose,  
600 Hex; *N*-acetyl glucosamine, GlcNAc; fucose, Fuc.

601

602 **Figure 2.** Designs with the N1-BR18 head-domain produce more active rNA. (A) Graph displaying  
603 the mean enzymatic activity of the indicated rNAs that was determined using the synthetic substrate  
604 Mu-NANA. The activity is expressed as relative fluorescence unit per sec (RFU/s) and corresponds  
605 to the value from 1  $\mu$ g of rNA. Purified BR18 $\times$ WSN virus (a reassortant carrying the HA and NA  
606 genes from BR18 and the internal genes from H1N1 A/WSN/1933) containing an equivalent amount  
607 of NA was included for comparison. Error bars represent the standard deviation (SD) from three  
608 technical repeats. (B) Michaelis-Menten kinetic analysis of N1-BR18 rNAs. The activity of the

609 indicated amounts of the rNAs was measured using increasing concentrations of Mu-NANA. The  
610 mean value is shown  $\pm$  SD from three technical repeats. (C) Diagram showing the reaction of TR1  
611 (structure in upper panel) with NA. The NA catalytic residue (Tyr406) makes a nucleophilic attack  
612 of the TR1 reagent (i), resulting in the release of F<sub>2</sub>Mu and a covalently bound TR1 sialic acid  
613 intermediate (iia). The presence of the guanidinium (Gu) and fluorine modifications decrease the  
614 subsequent attack by H<sub>2</sub>O (iib), which facilitates the sialic acid release. (D) Graph displaying the  
615 mean fluorescent measurements from the reaction of the indicated rNA amounts with the TR1 reagent  
616 from three independent runs using 30 sec intervals. (E) Correlation plot showing the protein  
617 concentrations of each rNA and the F<sub>2</sub>Mu concentration that was released from the TR1 reagent. The  
618 linear regression slopes, used to determine the fraction of active rNA in each preparation, are  
619 displayed. The data are means  $\pm$  SD from three technical repeats. Purified BR18 $\times$ WSN virus was  
620 included in all assays for comparison.

621

622 **Figure 3.** N1-BR18 rNAs retain the antigenicity of multiple head-domain epitopes. (A) Side (left  
623 panel) and top views (right panel) of an N1 dimer (PDB ID: 3NSS) showing the three epitopes that  
624 are recognized by mAbs CD6 (red), 4C4 (blue), and the broadly reactive mAbs 1H5 and 4E9 (green).  
625 The NA active site residues 118, 151, 152, 224, 276, 292, 371 and 406 are shown in yellow. (B) N1-  
626 BR18 rNAs were readily bound by mAbs CD6, 4C4, 1H5, and 4E9. Binding was measured by a  
627 sandwich ELISA, in which mAbs CD6, 4C4, and 1H5 were used to capture the rNAs and the HRP-  
628 conjugated mAbs 4E9 (4E9-HRP) and 4C4 (4C4-HRP) were used for detection. An N2-specific mAb  
629 B10 and a rNA from the strain A/Minnesota/11/2010 (H3N2) were used as negative controls. rNAs  
630 were tested at 1  $\mu$ g/ml. The data are means  $\pm$  SD from three technical repeats. (C) Serially diluted

631 N1-BR18 rNAs were captured with mAb CD6 and detected with the 4E9-HRP. The data are means  
632  $\pm$  SD from three technical repeats. Purified BR18 $\times$ WSN virus was included as a control.

633

634 **Figure 4.** Stability similarities and variations between N1-BR18 rNAs. (A) Graphs displaying the  
635 thermal melt curves for the rNAs. The rNAs were incubated for 10 min at the indicated temperatures,  
636 the enzymatic activity was measured and normalized using the activity of the sample at 37°C. Shown  
637 are the mean  $\pm$  SD of the data from three technical repeats together with the  $T_{50}$  value for each rNA.  
638 (B) The rNAs were subjected to 5 cycles of freezing on dry ice for 10 min and thawing briefly at  
639 37°C. The enzymatic activity was measured following each freeze-thaw and normalized using the  
640 activity from an untreated sample. Means from three technical repeats are displayed. (C) SEC profiles  
641 of the rNAs shortly after purification. The rNAs were adjusted to 0.5 mg/ml and equal volumes were  
642 loaded onto an SEC column. The absorbance at 220 nm ( $Abs_{220}$ ) versus the elution volume is shown  
643 with the estimated molecular weights corresponding to each peak (upper panels). The NA activity  
644 profiles of fractions collected between 4.0 and 8.8 ml are shown in the bottom panels, with the activity  
645 of each fraction being normalized to the peak activity, which is displayed for each rNA. (D) SEC  
646 profiles of the rNAs stored at -80°C or 4°C for 6 months.

647

648 **Figure 5.** N1-BR18 rNAs elicit different protective immune responses in mice. (A) Mice received  
649 two i.m. injections 21-days apart with 5  $\mu$ g rNA or a single-dose i.m. immunization with 5, 2, or 0.2  
650  $\mu$ g rNA. On day 21 after the second dose or day 28 after the single-dose immunization, 3 mice from  
651 each group (except those immunized with 0.2  $\mu$ g rNA) were euthanized to collect sera for antibody  
652 assessment, while the remaining mice were challenged with 10 LD<sub>50</sub> of H6N1<sub>BR18</sub> $\times$ PR8 virus and  
653 monitored for weight loss and mortality for up to 14 days. Purified BR18 $\times$ WSN virus was used as a

654 positive control in the two-dose immunizations, PBS was used as the negative control, and all  
655 immunizations were conducted with 5  $\mu$ g poly(I:C) adjuvant. (B) Serum NA-binding antibody titers  
656 measured with ELISA and (C) Serum NAI antibody titers measured with ELLA. H6N1<sub>BR18</sub>×PR8  
657 virus was used as the antigen for both the ELISA and ELLA measurements. The limits of detection  
658 (denoted by the dotted lines) for ELISA and ELLA were 125 (2.1 log<sub>10</sub>) and 20 (1.3 log<sub>10</sub>),  
659 respectively, and titers below these limits were arbitrarily set to 25 (1.4 log<sub>10</sub>) for ELISA and 5 (0.7  
660 log<sub>10</sub>) for ELLA for the purpose of calculation. Shown are the mean  $\pm$  SD (n=3) of data from two  
661 technical repeats. (D) Survival (left panel) and weight loss (right panel) of mice (n=5) challenged  
662 with virus after two-dose immunizations with 5  $\mu$ g of the indicated rNA. (E-G) Survival and weight  
663 loss of mice challenged with virus after a single immunization with (E) 5  $\mu$ g, (F) 2  $\mu$ g, or (G) 0.2  $\mu$ g  
664 of the indicated rNA. (n=5 in the 5 and 2  $\mu$ g groups, n= 4 in the 0.2  $\mu$ g group)

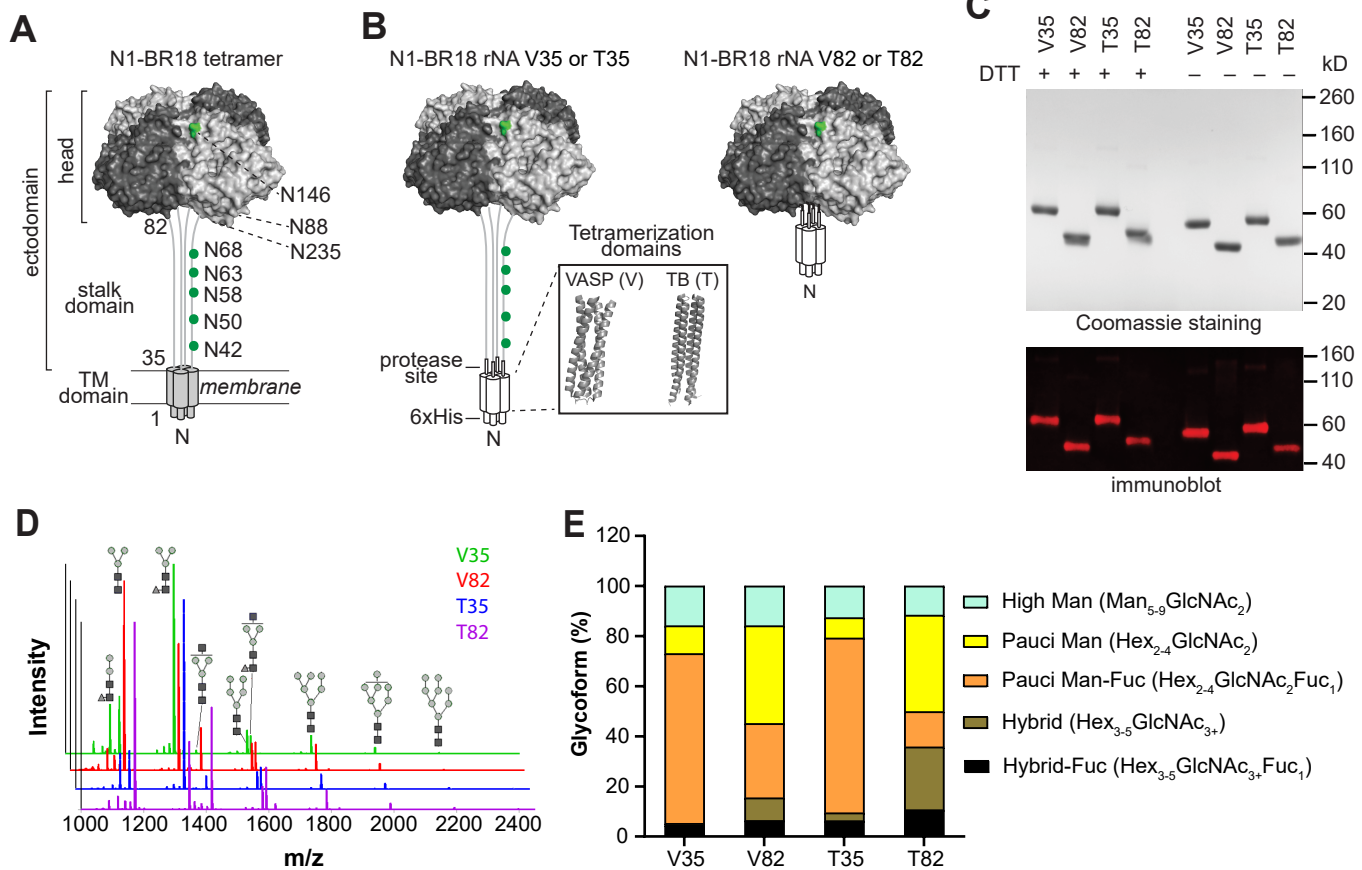

**Figure 1. Characterization of N1-BR18 rNAs.** (A) A schematic diagram of full-length N1-BR18 showing the trans-membrane (TM) domain and the ectodomain, which includes the NA head and stalk. Potential N-linked glycosylation sites are labeled (green). Sites 88 and 235 are not visible in the displayed view. (B) Diagrams of the N1-BR18 rNA construct designs. V35 and T35 contain the full-ectodomain of N1-BR18 (residues 35-469) connected to the tetramerization domains from VASP (V35) or TB (T35). V82 and T82 are designed similarly using the N1-BR18 head-domain (residues 82-469). Structures of tetramerization domains from VASP (PDB ID: 1USE) and TB (PDB ID: 1FE6) are shown in a box. (C) Representative images of a Coomassie stained SDS-PAGE gel containing the rNAs (2  $\mu$ g/lane) and an immunoblot (0.2  $\mu$ g NA/lane) resolved using a N1-specific mAb. The rNAs were untreated or reduced with DTT prior to resolution by SDS-PAGE. (D) Spectra of PNGase F-released N-linked permethylated glycans from each rNA. Structures of the most abundant glycoforms are shown, mannose (grey circles), N-acetyl glucosamine (black squares) and fucose (grey triangle). (E) Graph displaying the abundance of the different glycoform subtypes. Mannose, Man; hexose, Hex; N-acetyl glucosamine, GlcNAc; fucose, Fuc.

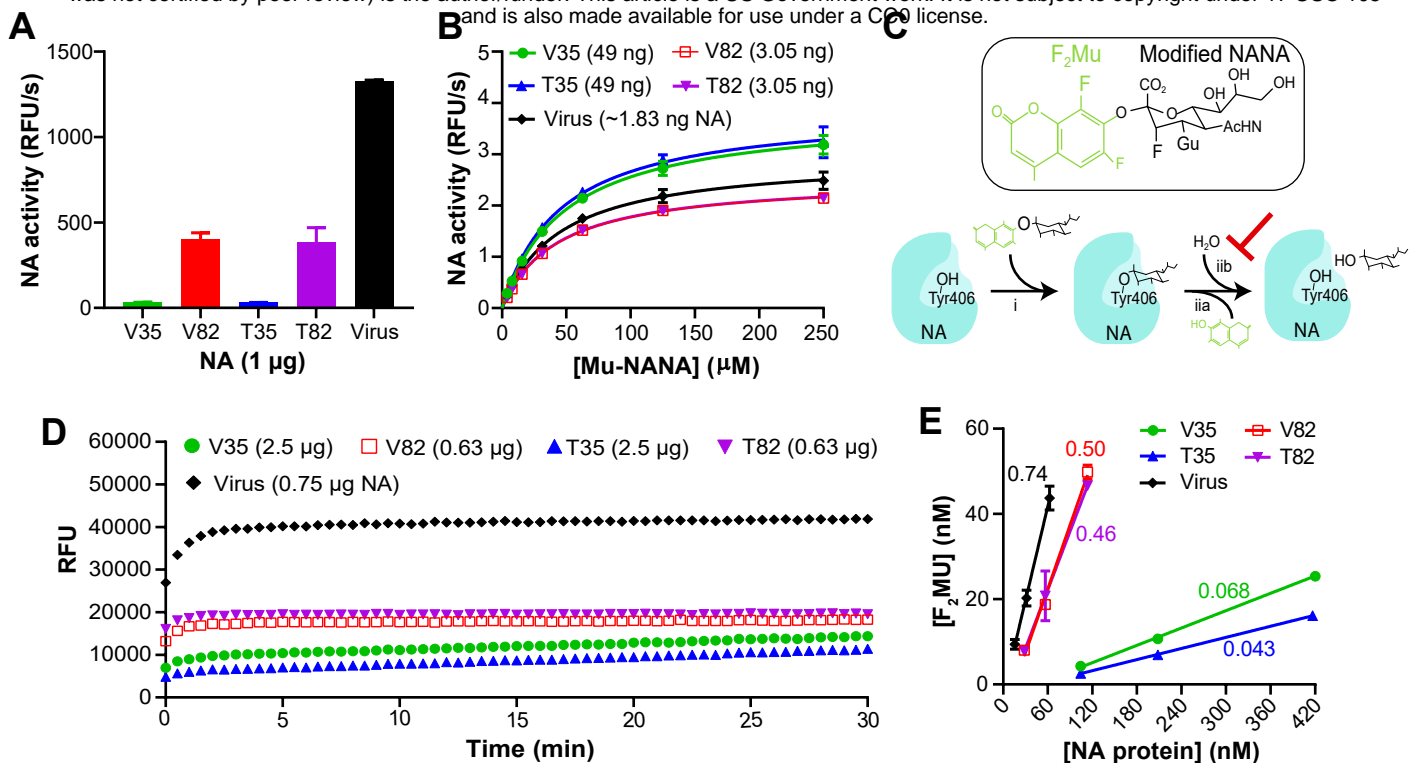

**Figure 2. Designs with the N1-BR18 head-domain produce more active rNA.** (A) Graph displaying the mean enzymatic activity of the indicated rNAs that was determined using the synthetic substrate Mu-NANA. The activity is expressed as relative fluorescence unit per sec (RFU/s) and corresponds to the value from 1 µg of rNA. Purified BR18×WSN virus (a reassortant carrying the HA and NA genes from BR18 and the internal genes from H1N1 A/WSN/1933) containing an equivalent amount of NA was included for comparison. Error bars represent the standard deviation (SD) from three technical repeats. (B) Michaelis-Menten kinetic analysis of N1-BR18 rNAs. The activity of the indicated amounts of the rNAs was measured using increasing concentrations of Mu-NANA. The mean value is shown ± SD from three technical repeats. (C) Diagram showing the reaction of TR1 (structure in upper panel) with NA. The NA catalytic residue (Tyr406) makes a nucleophilic attack of the TR1 reagent (i), resulting in the release of F<sub>2</sub>Mu and a covalently bound TR1 sialic acid intermediate (iia). The presence of the guanidinium (Gu) and fluorine modifications decrease the subsequent attack by H<sub>2</sub>O (iib), which facilitates the sialic acid release. (D) Graph displaying the mean fluorescent measurements from the reaction of the indicated rNA amounts with the TR1 reagent from three independent runs using 30 sec intervals. (E) Correlation plot showing the protein concentrations of each rNA and the F<sub>2</sub>MU concentration that was released from the TR1 reagent. The linear regression slopes, used to determine the fraction of active rNA in each preparation, are displayed. The data are means ± SD from three technical repeats. Purified BR18×WSN virus was included in all assays for comparison.

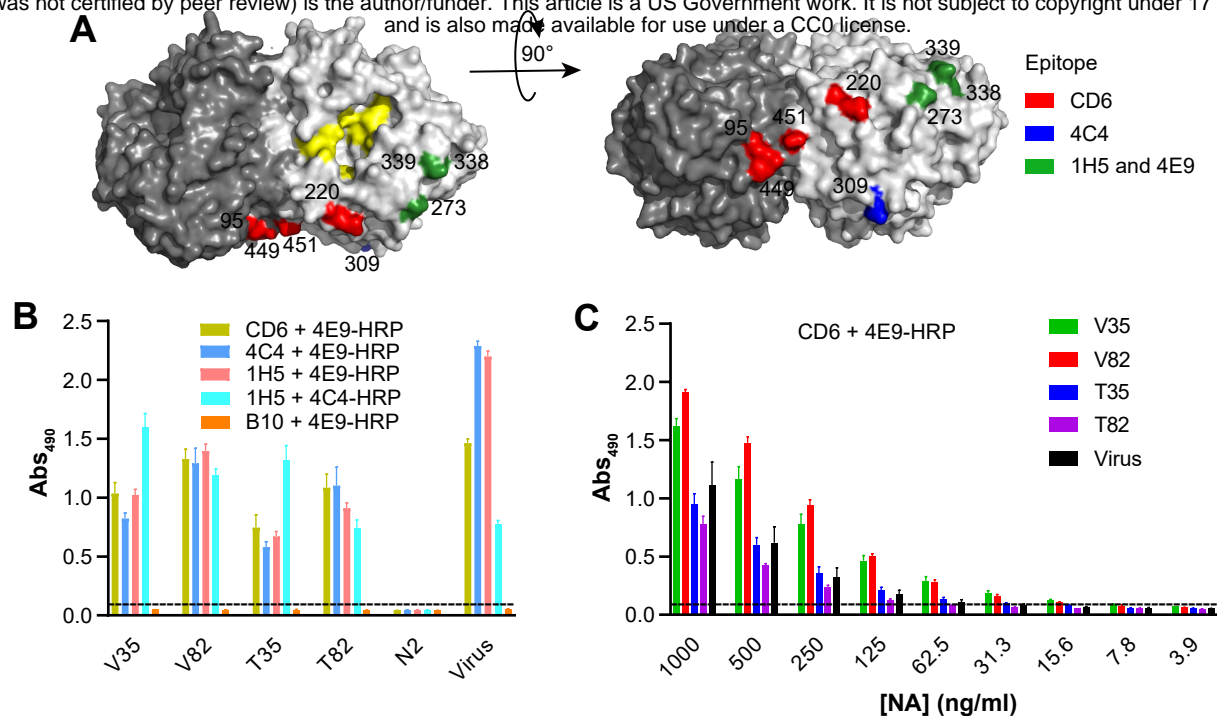

**Figure 3. N1-BR18 rNAs retain the antigenicity of multiple head-domain epitopes. (A)** Side (left panel) and top views (right panel) of an N1 dimer (PDB ID: 3NSS) showing the three epitopes that are recognized by the mAbs CD6 (red), 4C4 (blue), and the broadly reactive mAbs 1H5 and 4E9 (green). The NA active site residues 118, 151, 152, 224, 276, 292, 371 and 406 are shown in yellow. **(B)** N1-BR18 rNAs were readily bound by mAbs CD6, 4C4, 1H5, and 4E9. Binding was measured by a sandwich ELISA, in which mAbs CD6, 4C4, and 1H5 were used to capture the rNAs and the HRP-conjugated mAbs 4E9 (4E9-HRP) and 4C4 (4C4-HRP) were used for detection. An N2-specific mAb B10 and a rNA from the strain A/Minnesota/11/2010 (H3N2) were used as negative controls. rNAs were tested at 1  $\mu$ g/ml. The data are means  $\pm$  SD from three technical repeats. **(C)** Serially diluted N1-BR18 rNAs were captured with mAb CD6 and detected with the 4E9-HRP. The data are means  $\pm$  SD from three technical repeats. Purified BR18 $\times$ WSN virus was included as a control.

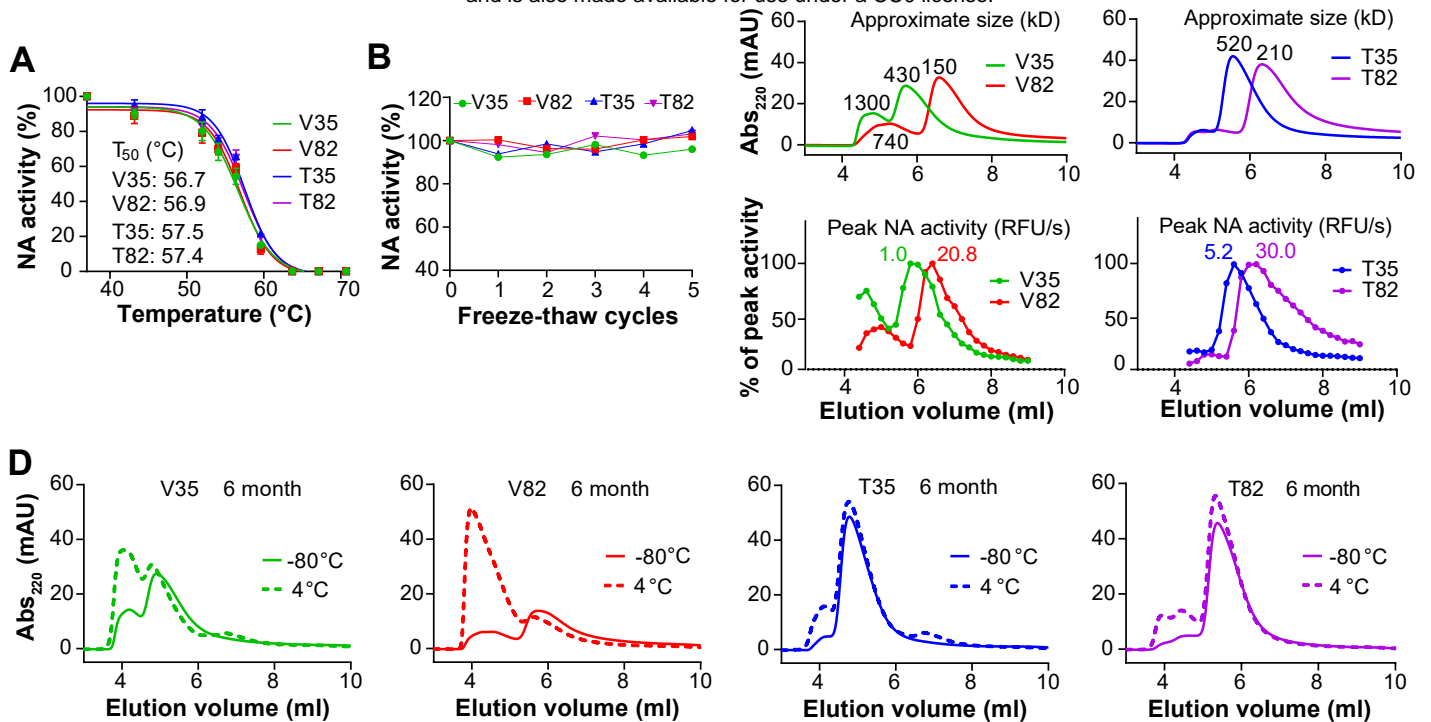

**Figure 4. Stability similarities and variations between N1-BR18 rNAs.** (A) Graphs displaying the thermal melt curves for the rNAs. The rNAs were incubated for 10 min at the indicated temperatures, the enzymatic activity was measured and normalized using the activity of the sample at 37°C. Shown are the mean  $\pm$  SD of the data from three technical repeats together with the  $T_{50}$  value for each rNA. (B) The rNAs were subjected to 5 cycles of freezing on dry ice for 10 min and thawing briefly at 37°C. The enzymatic activity was measured following each freeze-thaw and normalized using the activity from an untreated sample. Means from three technical repeats are displayed. (C) SEC profiles of the rNAs shortly after purification. The rNAs were adjusted to 0.5 mg/ml and equal volumes were loaded onto an SEC column. The absorbance at 220 nm (Abs<sub>220</sub>) versus the elution volume is shown with the estimated molecular weights corresponding to each peak (upper panels). The NA activity profiles of fractions collected between 4.0 and 8.8 ml are shown in the bottom panels, with the activity of each fraction being normalized to the peak activity, which is displayed for each rNA. (D) SEC profiles of the rNAs stored at -80°C or 4°C for 6 months.



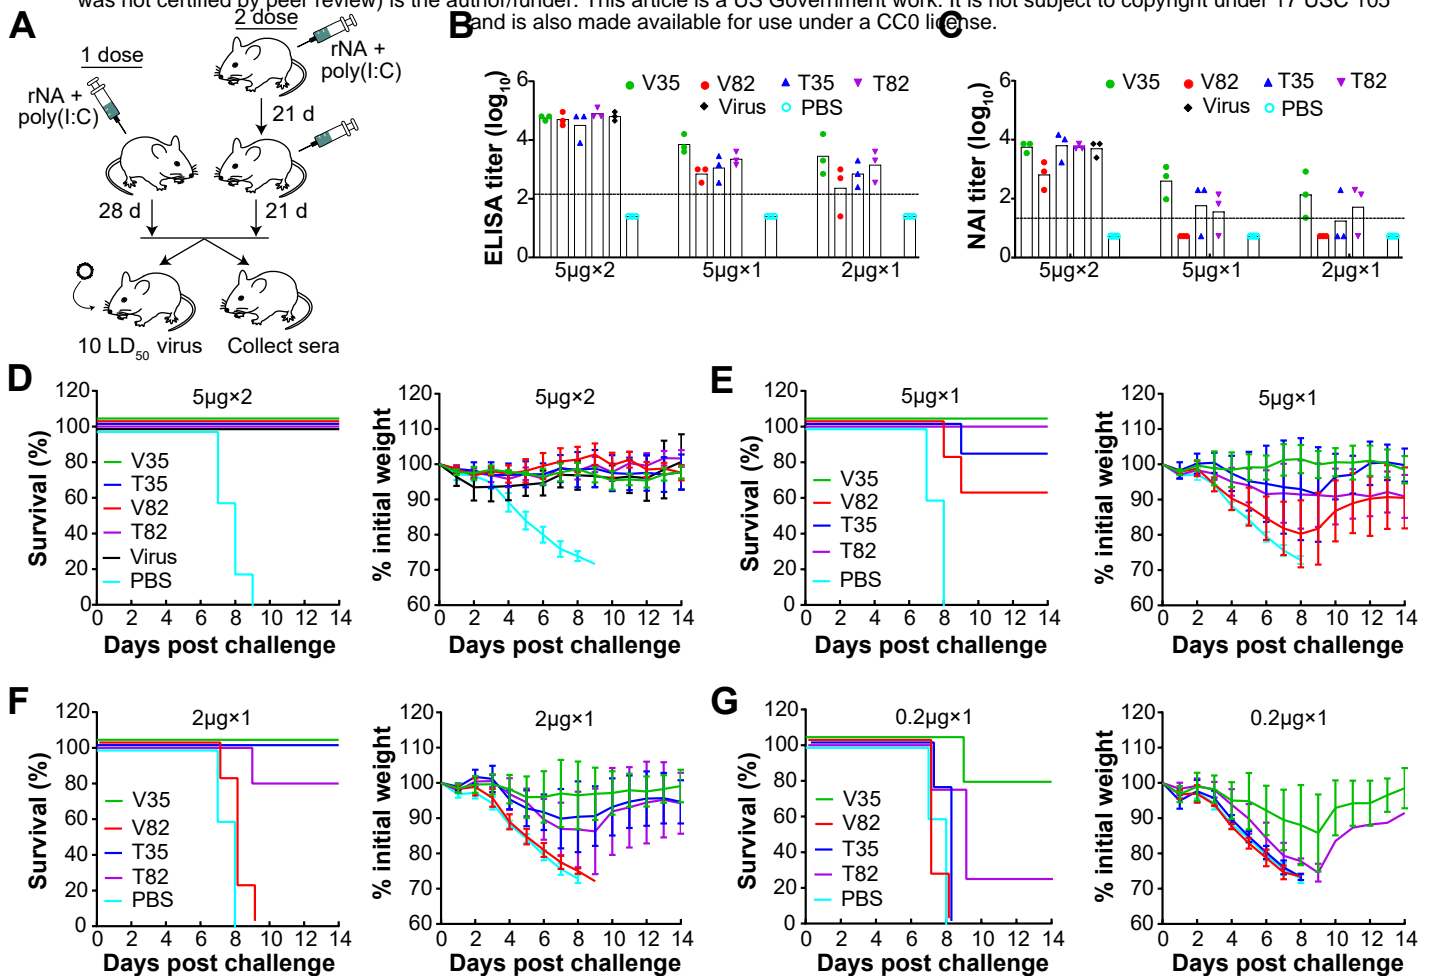

**Figure 5. N1-BR18 rNAs elicit different protective immune responses in mice.** (A) Mice received two i.m. injections 21-days apart with 5 µg rNA or a single-dose i.m. immunization with 5, 2, or 0.2 µg rNA. On day 21 after the second dose or day 28 after the single-dose immunization, 3 mice from each group (except those immunized with 0.2 µg rNA) were euthanized to collect sera for antibody assessment, while the remaining mice were challenged with 10 LD<sub>50</sub> of H6N1<sub>BR18</sub>×PR8 virus and monitored for weight loss and mortality for up to 14 days. Purified BR18×WSN virus was used as a positive control in the two-dose immunizations, PBS was used as the negative control, and all immunizations were conducted with 5 µg poly(I:C) adjuvant. (B) Serum NA-binding antibody titers measured with ELISA and (C) Serum NAI antibody titers measured with ELLA. H6N1<sub>BR18</sub>×PR8 virus was used as the antigen for both the ELISA and ELLA measurements. The limits of detection (denoted by the dotted lines) for ELISA and ELLA were 125 (2.1 log<sub>10</sub>) and 20 (1.3 log<sub>10</sub>), respectively, and titers below these limits were arbitrarily set to 25 (1.4 log<sub>10</sub>) for ELISA and 5 (0.7 log<sub>10</sub>) for ELLA for the purpose of calculation. Shown are the mean ± SD (n=3) of data from two technical repeats. (D) Survival (left panel) and weight loss (right panel) of mice (n=5) challenged with virus after two-dose immunizations with 5 µg of the indicated rNA. (E-G) Survival and weight loss of mice challenged with virus after a single immunization with (E) 5 µg, (F) 2 µg, or (G) 0.2 µg of the indicated rNA. (n=5 in the 5 and 2 µg groups, n= 4 in the 0.2 µg group).
